# Supplementary material
Source: Research Square preprint supplement (doi:10.21203/rs.3.rs-8929138/v1)
Supplement: Supplementary file 1 [file b45f337997a2a0cf934a3a65.docx]

**Tables**

## Table 1. Germline *BRCA* Testing Overview

| **Measure** | **n** | **% of total cohort (N=726)** | **% among tested (N=600)** | **% among mBRCA (N=105)** |
| --- | --- | --- | --- | --- |
| Total cohort | 726 | 100.0% | - | - |
| Tested with results available | 600 | 82.6% | 100.0% | - |
| Not tested / testing status unavailable | 126 | 17.4% | - | - |
| *mBRCA* (pathogenic/likely pathogenic) | 105 | 14.5% | 17.5% | 100.0% |
| *wtBRCA* among tested | 495 | 68.2% | 82.5% | - |
| Control group (wt/unkBRCA) | 621 | 85.5% | - | - |
| *- BRCA1* | 82 | 11.3% | 13.7% | 78.1% |
| *- BRCA2* | 22 | 3.0% | 3.7% | 21.0% |
| - *BRCA* subtype not specified | 1 | 0.1% | 0.2% | 1.0% |

## Table 2. Comparative Clinical and Treatment Characteristics: m*BRCA* vs wt/unk*BRCA* Cohorts.

| **Characteristic** | **m*BRCA* (n=105)** | **wt/unk*BRCA* (n=621)** | **p-value** |
| --- | --- | --- | --- |
| Median age (years) | 40.2 | 45.3 | <0.001 |
| Premenopausal status | 61.1% | 51.6% | 0.029 |
| Clinical stage | Stage II: 72.0% / Stage III: 27.7% | Stage II: 73.0% / Stage III: 27.7% | 0.96 |
| Histologic grade 3 | 80.2% | 74.2% | 0.25 |
| Median Ki-67 | 80% | 70% | 0.01 |
| Histology: NST | 95% | 88% | — |
| TILs ≥ 30% | 40.7% | 26.2% | 0.117 |
| Mastectomy | 88.3% | 34.7% | <0.001 |
| Adjuvant chemotherapy | 3.3% | 22.2% | <0.001 |
| Adjuvant immunotherapy (pembrolizumab) | 83.3% | 78.2% | 0.98 |
| Adjuvant radiotherapy | 64.4% | 87.1% | <0.001 |

## Table 3. Univariate and multivariable analysis of factors associated with pathologic complete response.

|  | **Univariate analysis** | | | **Multivariable analysis** | | | |
| --- | --- | --- | --- | --- | --- | --- | --- |
|  | **OR** | **95% CI** | **P-value** | **OR** | **95% CI** | **P-value** |
| *BRCA*1/2 (mutated vs wild-type/unknown) | 1.78 | 1.10 – 2.87 | 0.017 | 1.70 | 1.01 – 2.89 | 0.048 |
| Ki67 index (≥ 50% vs < 50%) | 2.67 | 1.85 – 3.86 | < 0.001 | 2.36 | 1.56 – 3.58 | <0.001 |
| TILs (≥ 30% vs < 30%) | 2.70 | 1.39 – 5.27 | 0.026 | - | - | - |
| Tumor grade (3 vs 1-2) | 1.82 | 1.25 – 2.65 | 0.002 | 1.45 | 0.95 - 2.22 | 0.080 |
| Disease stage (III vs II) | 0.54 | 0.38 - 0.78 | 0.001 | 0.52 | 0.35 - 0.78 | 0.002 |
| AC regimen (dose-dense vs every 3-week) | 1.14 | 0.83 – 1.58 | 0.399 | - | - | - | |
| Number of neoadjuvant pembrolizumab cycles (< 6 versus ≥ 6) | 0.52 | 0.34 – 0.80 | 0.003 | 0.48 | 0.30 - 0.76 | 0.002 | |

**Table 4. pCR and survival according to germline *mBRCA* status in TNBC treated with KEYNOTE-522–based regimens**

| **Study / year** | **Total N** | ***BRCA* status distribution** | **pCR *mBRCA* vs wt*BRCA* (%)** | **p-value (pCR)** | **Survival signal (*mBRCA* vs *wtBRCA)*** |
| --- | --- | --- | --- | --- | --- |
| Fedele et al., 2025 | 184 | *mBRCA:* 37 (20.1%); *wtBRCA:* 147 (79.9%) | 78.4 vs 61.1 | 0.05 | Higher pCR in *mBRCA;* survival data immature/not reported. |
| Bae / Kim et al., 2024 | 199 | *mBRCA:* 49 (24.6%); *wtBRCA:* 150 (75.4%) | 73.5 vs 59.3 | 0.075 | No clear DFS difference by *mBRCA;* no significant interaction with pembrolizumab. |
| Etan et al., 2025 | ≈100 | *mBRCA:* 32 (≈32%); *wtBRCA:* 68 (≈68%) | 100 vs 64.7 | NR | KN522 improves OS/EFS vs ACTC overall; outcomes mainly driven by pCR, not *mBRCA* status alone. |
| Park et al., 2025 | 316 | *mBRCA*: 46 (14.6%); *wtBRCA:* 270 (85.4%) | 73.9 vs 59.3 | 0.040 | *mBRCA* not independent for DFS (HR 1.71; 95% CI 0.63–4.65); pCR strongly prognostic. |
| Tavares et al., 2025 (Neo-Real) | 726 | *mBRCA*: 105 (14.5%); *wtBRCA:* 621 (85.5%) | 74.0 vs 61.7 | 0.0244 | Trend to better EFS in *mBRCA;* survival predominantly driven by achievement of pCR. |
